# Supplementary material
Source: Springer Nature journal article supplement (https://www.springermedizin.de/resource/supplementary/12872_2014_820_MOESM2_ESM.pdf/9430494)
Supplement: MOESM2 [file 9430494]

**Revisiting the J shaped curve, exploring the association between cardiovascular risk factors and concurrent depressive symptoms in patients with cardiometabolic disease: Findings from a large cross-sectional study.**

**Supplement 2 – Linear Regression with HADS-D as Continuous Measure**

**Systolic Blood Pressure (SBP)- Linear Regression Analysis**

**Table 1: Title: Results of multiple linear regression for outcome of concurrent depressive symptoms (HADS-D) without extreme values for Systolic Blood Pressure.** Legend: SBP: Systolic Blood Pressure. The table shows regression of analysed data after excluding extreme values for SBP (SBP <90 mm Hg and SBP >240 mm Hg) with HADS-D as a continuous variable. HADS-D was transformed into square root (HADS-D) as it was not normally distributed.

|                                      | <b>Regression 1- Analysed Data without extreme values<br/>N=32029</b> |                |                       |
|--------------------------------------|-----------------------------------------------------------------------|----------------|-----------------------|
| <b>Variable</b>                      | <b>Regression co-efficient</b>                                        | <b>p-value</b> | <b>Standard Error</b> |
| <b>SBP</b>                           | -1.61                                                                 | <0.001         | 2.94                  |
| <b>SBP ^2</b>                        | 5.57                                                                  | <0.001         | 1.06                  |
| <b>Age Group(65-90)</b>              | -9.06                                                                 | <0.001         | 1.16                  |
| <b>Sex (Male)</b>                    | -1.36                                                                 | <0.001         | 1.08                  |
| <b>Deprivation Status (Affluent)</b> | -2.82                                                                 | <0.001         | 1.11                  |
| <b>Co-morbid Conditions</b>          |                                                                       |                |                       |
| <b>Two</b>                           | 1.86                                                                  | <0.001         | 1.29                  |
| <b>Three</b>                         | 3.05                                                                  | <0.001         | 3.55                  |

**Diastolic Blood Pressure (DBP)-Linear Regression Analysis**

**Table 2: Title: Results of multiple linear regression for outcome of concurrent depressive symptoms (HADS-D) without extreme values for Diastolic Blood Pressure.** Legend: DBP: Diastolic Blood Pressure. The table shows the regression of analysed data after excluding extreme values for DBP (DBP <50 mm Hg and DBP >130 mm Hg) with HADS-D as a continuous variable. HADS-D was transformed into square root (HADS-D) as it was not normally distributed.

| <b>Regression 2- Analysed Data without extreme values<br/>N=31972</b> |                                |                |                       |
|-----------------------------------------------------------------------|--------------------------------|----------------|-----------------------|
| <b>Variable</b>                                                       | <b>Regression co-efficient</b> | <b>p-value</b> | <b>Standard Error</b> |
| <b>DBP</b>                                                            | -1.90                          | <0.001         | 5.10                  |
| <b>DBP ^2</b>                                                         | 1.21                           | <0.001         | 3.33                  |
| <b>Age Group(65-90)</b>                                               | -9.66                          | <0.001         | 1.19                  |
| <b>Sex (Male)</b>                                                     | -1.35                          | <0.001         | 1.08                  |
| <b>Deprivation Status (Affluent)</b>                                  | -2.83                          | <0.001         | 1.11                  |
| <b>Co-morbid Conditions</b>                                           |                                |                |                       |
| <b>Two</b>                                                            | 1.86                           | <0.001         | 1.29                  |
| <b>Three</b>                                                          | 3.03                           | <0.001         | 3.57                  |

**Total Cholesterol-Linear Regression Analysis**

**Table 3: Title: Results of multiple linear regression for outcome of concurrent depressive symptoms (HADS-D) without extreme values for Total Cholesterol.** Legend: The table shows the regression of analysed data after excluding extreme values for Total Cholesterol (Total Cholesterol < 2 mmol/l and Total Cholesterol > 10 mmol/l) with HADS-D as a continuous variable. HADS-D was transformed into square root (HADS-D) as it was not normally distributed. Total Cholesterol was log transformed as it was not normally distributed.

| <b>Regression 3- Analysed Data without extreme values<br/>N=31244</b> |                                |                |                       |
|-----------------------------------------------------------------------|--------------------------------|----------------|-----------------------|
| <b>Variable</b>                                                       | <b>Regression co-efficient</b> | <b>p-value</b> | <b>Standard Error</b> |
| <b>Log (total cholesterol)</b>                                        | -0.90                          | <0.001         | 0.19                  |
| <b>Log (total cholesterol) ^2</b>                                     | 0.35                           | <0.001         | 0.06                  |
| <b>Age Group(65-90)</b>                                               | -0.07                          | <0.001         | 0.01                  |
| <b>Sex (Male)</b>                                                     | -0.12                          | <0.001         | 0.01                  |
| <b>Deprivation Status (Affluent)</b>                                  | -0.28                          | <0.001         | 0.01                  |
| <b>Co-morbid Conditions</b>                                           |                                |                |                       |
| <b>Two</b>                                                            | 0.19                           | <0.001         | 0.01                  |
| <b>Three</b>                                                          | 0.32                           | <0.001         | 0.03                  |

**Body Mass Index-Linear Regression Analysis**

**Table 4: Title: Results of multiple linear regression for outcome of concurrent depressive symptoms (HADS-D) without extreme values for Body Mass Index.** Legend: BMI: Body Mass Index. The table shows the regression of analysed data after excluding extreme values for BMI (BMI < 15 kg/m<sup>2</sup> and BMI > 55 kg/m<sup>2</sup>) with HADS-D as a continuous variable. HADS-D was transformed into square root (HADS-D) as it was not normally distributed. BMI was log transformed as it was not normally distributed.

| <b>Regression 4- Analysed Data without extreme values<br/>N=30042</b> |                                |                |                       |
|-----------------------------------------------------------------------|--------------------------------|----------------|-----------------------|
| <b>Variable</b>                                                       | <b>Regression co-efficient</b> | <b>p-value</b> | <b>Standard Error</b> |
| <b>Log (BMI)</b>                                                      | -9.51                          | <0.001         | 0.67                  |
| <b>Log (BMI) ^2</b>                                                   | 1.41                           | <0.001         | 0.10                  |
| <b>Age Group(65-90)</b>                                               | -0.08                          | <0.001         | 0.01                  |
| <b>Sex (Male)</b>                                                     | -0.11                          | <0.001         | 0.01                  |
| <b>Deprivation Status (Affluent)</b>                                  | -0.27                          | <0.001         | 0.01                  |
| <b>Co-morbid Conditions</b>                                           |                                |                |                       |
| <b>Two</b>                                                            | 0.18                           | <0.001         | 0.01                  |
| <b>Three</b>                                                          | 0.33                           | <0.001         | 0.03                  |

**HbA1c-Linear Regression Analysis**

**Table 5: Title: Results of multiple linear regression for outcome of concurrent depressive symptoms (HADS-D) without extreme values for HbA1c.** Legend: The table shows the regression of analysed data after excluding extreme values HbA1c (HbA1c < 3 DCCT and HbA1c>18 DCCT). Regression 5b shows results of data including extreme values with HADS-D as a continuous variable. HADS-D was transformed into square root (HADS-D) as it was not normally distributed. HbA1c was log transformed as it was not normally distributed.

| <b>Regression 5- Analysed Data without extreme values<br/>N=15676</b> |                                |                |                       |
|-----------------------------------------------------------------------|--------------------------------|----------------|-----------------------|
| <b>Variable</b>                                                       | <b>Regression co-efficient</b> | <b>p-value</b> | <b>Standard Error</b> |
| <b>Log (HbA1c)</b>                                                    | -2.13                          | <0.001         | 0.55                  |
| <b>Log (HbA1c) ^2</b>                                                 | 0.55                           | <0.001         | 0.13                  |
| <b>Age Group(65-90)</b>                                               | -0.07                          | <0.001         | 0.01                  |
| <b>Sex (Male)</b>                                                     | -0.12                          | <0.001         | 0.01                  |
| <b>Deprivation Status (Affluent)</b>                                  | -0.25                          | <0.001         | 0.01                  |
| <b>Co-morbid Conditions</b>                                           |                                |                |                       |
| <b>Two</b>                                                            | 0.24                           | <0.001         | 0.01                  |
| <b>Three</b>                                                          | 0.40                           | <0.001         | 0.03                  |
